# Supplementary material for: Syntaxin-1/TI-VAMP SNAREs interact with Trk receptors and are required for neurotrophin-dependent outgrowth
Source: PubMed Central journal article supplement (PMC6267591; doi:10.18632/oncotarget.26307), 2018-11-13
Supplement: oncotarget-09-35922-s001.pdf [file oncotarget-09-35922-s001.pdf]

## Syntaxin-1/TI-VAMP SNAREs interact with Trk receptors and are required for neurotrophin-dependent outgrowth

### SUPPLEMENTARY MATERIALS

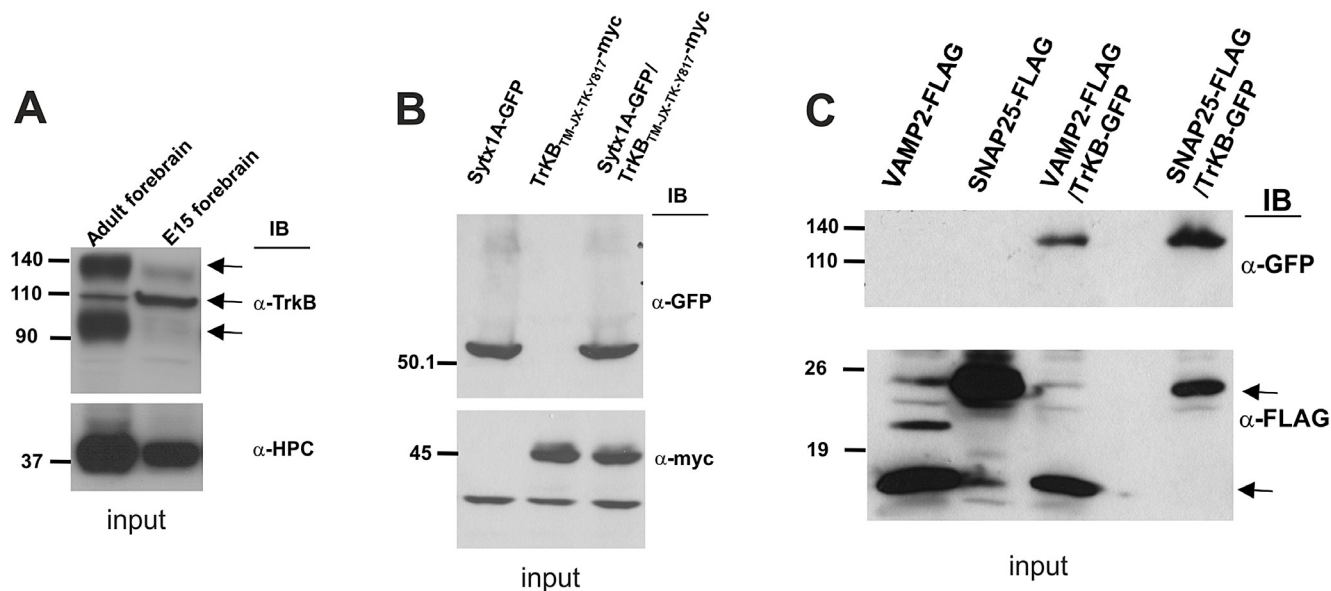

**Supplementary Figure 1: Examples of inputs of TrkB and Sytx1 immunoprecipitation experiments, corresponding to the experiments shown in Figures 1A, 1B, 2A and 2B.** Experiments are from E15 and adult forebrain homogenates (20  $\mu$ g of total protein) (A) and from HEK293 cells transfected with pSytx1AEGFP alone or together with pCMVtag3A-TrkB<sub>TM-JX-TK-Y817</sub> (B) or transfected with pEF-BOS-SNAP25-FLAG alone or together with pEGFPC1-TrkB or with pEF-BOS-VAMP2-FLAG<sub>TM-JX-TK-Y817</sub> alone or together with pEGFPC1-TrkB (C).

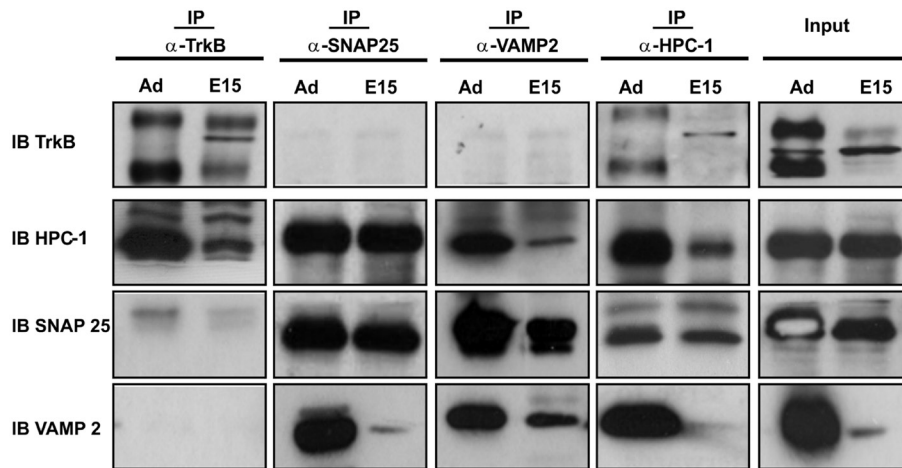

**Supplementary Figure 2: TrkB, SNAP25 and VAMP2 immunoprecipitation of E15 forebrain and adult homogenates (100  $\mu$ g of total protein).** To allow comparison, we have also included panels of Figure 1A for Sytx-1-TrkB co-immunoprecipitation. Last row: inputs using the antibody of each protein. No co-immunoprecipitation was detected between TrkB and SNAP25 or VAMP2.

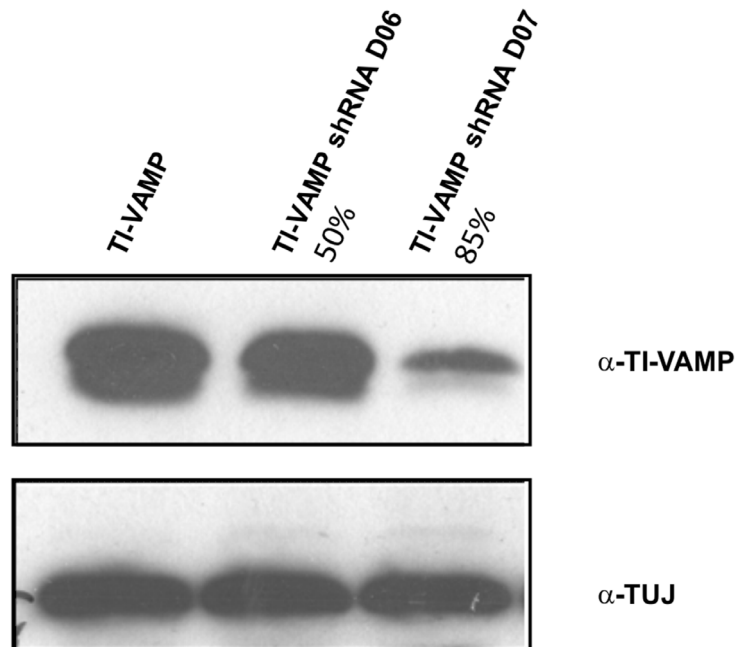

**Supplementary Figure 3: Downregulation of TI-VAMP.** Expression of TI-VAMP alone and together with the TI-VAMP shRNA D06 or TI-VAMP shRNA D07 in HEK293 cells, showing that these shRNAs show a 50% and 85% decrease the expression of TI-VAMP, respectively.
